# Supplementary material
Source: PubMed Central journal article supplement (PMC8032253)
Supplement: mmc1.pdf [file mmc1.pdf]

# THE LANCET

## Supplementary appendix

This translation in Chinese was submitted by the authors and we reproduce it as supplied. It has not been peer reviewed. *The Lancet's* editorial processes have only been applied to the original in English, which should serve as reference for this manuscript.

此简体中文译文由作者提交，我方按照提供的版本刊登。此译文并未经过同行审阅。医学期刊《柳叶刀》的编辑流程仅适用于英文原稿，英文原稿应作为此手稿的参考。

Supplement to: Li L, Wang K, Chen Z, Koplan JP. US–China health exchange and collaboration following COVID-19. *Lancet* 2021; published online April 8. [http://dx.doi.org/10.1016/S0140-6736\(21\)00734-0](http://dx.doi.org/10.1016/S0140-6736(21)00734-0).

# 新冠疫情后的中美卫生交流与合作

李立明, 王克安, 陈苗, Jeffrey P. Koplan

中美在卫生和医学方面的有力合作是全球抗击新冠疫情的关键因素。本文回顾了中美公共部门和私营机构在卫生方面合作与交流的历史, 包括两国政府公共卫生部门的长期合作; 两国应尽快恢复学术与科学交流, 并承认非营利性基金会日益重要的作用。中美两国的共同利益和严峻的疫情迫切需要双方开展合作并互相配合。为控制仍在持续发展的新冠疫情和应对未来的威胁, 本文向两国政府与全球卫生界提出了建议。

## 引言

过去 4 年间, 贸易、关税与其他经济和安全问题导致中美关系紧张。新型冠状病毒病带来的疫情相关问题、透明度、数据共享与两国间的公开争端等问题则使两国关系进一步恶化。我们从历史角度论证了中美在卫生领域开展交流的可行性, 强调通过合作所取得的成就, 指出了在充满不信任与分歧的动荡岁月之后此类交流合作的紧迫性, 并概述了可使两国互利共赢的关键领域。

## 中美卫生领域合作的历史

中美在卫生和医学方面的关系远不如政治方面紧张。自尼克松总统 1972 年访华以来, 中美的科学交流与合作关系蓬勃发展。二十世纪八十年代早期, 为促进两国公共卫生与卫生服务研究方面的合作, 美国政府卫生部门领导人组团到访中国。<sup>1,2</sup> 访问团成员包括: 美国疾病控制与预防中心 (CDC) 的代表, 美国国立卫生研究院 (NIH) 院所负责人, 以及当时的美国卫生教育和福利部副部长朱利叶斯·里士满博士。美方与中国学者和政府领导人合作, 成立了一个长期特别工作组--中美医药公共卫生联合委员会, 其中的公共卫生和卫生服务组由布莱恩特博士 (任期 1980-1982) 和卡普兰博士 (任期 1982-1992) 分别与上海医学院杨铭鼎教授 (任期 1980-1992) 担任联合组长。

特别工作组迅速促成了实质性的合作: 《美国公共卫生杂志》出版了以中国公共卫生为主题的特刊, 特刊中每一篇文章均由中美学者联合署名。<sup>3</sup> 在接下来的四十年间, 中国与美国卫生研究机构的联系日益紧密。两

国的教育机构、卫生和医学中心以及医院间建立起了实质性的长期合作。<sup>4</sup> 表 1 列举了两国政府机关、学术机构、非营利性组织与私营机构在生物医学研究、医学教育、公共卫生与全球卫生方面成果的一小部分。

两国政府卓有成效的卫生和医学领域合作案例不胜枚举。中美新生儿神经管缺陷预防合作项目于二十世纪九十年代由美国疾控中心与中国机构合作建立, 在叶酸的预防功效方面取得了里程碑式的发现, 并为美国叶酸强化政策提供了科学依据。<sup>9, 17</sup> 2002 年 1 月, 中国预防医学科学院改组为中国疾病预防控制中心 (中国 CDC), 成为中国的主要公共卫生机构。美国疾控中心和新成立的中国疾控中心紧密合作, 签署了合作备忘录, 开展年度主任级别会议 (2002-2016) 就全球卫生与合作通报情况并交换意见。美国疾控中心帮助建立的项目包括中国现场流行病学培训项目 (CFETP) 和结核病预防与控制合作项目。这些合作在中国应对非典 (SARS)、禽流感 and 新冠疫情等新发传染病时发挥了至关重要的作用, 对于全球卫生安全也有重要意义。尽管当时双边关系已经冷却, 美国国立卫生研究院和中国国家自然科学基金委员会等国家科研基金机构仍保持伙伴关系, 鼓励生物医学合作研究的开展。<sup>18</sup>

在学术界, 自卡特政府倡导中美学生交换之后, 据估计自 2015 年以来每年有超过三十五万的中国学生在美国各级教育机构学习。<sup>19, 20</sup> 2018 年在美国已在中国和美国担任不同部门的领导职位, 如系主任和院长。虽然数据滥用、知识产权问题以及损害合作

北京大学公众健康与重大疫情防控战略研究中心主任, 北京大学博雅特聘教授 (李立明)

中国新探健康发展研究中心创办者、名誉理事长 (王克安)

美国佐治亚大学公共卫生学院公共卫生博士项目主任、卫生政策与管理学副教授 (陈苗)

宁波诺丁汉大学人文与社会科学学院经济系健康经济中心学术主任暨健康经济学客座教授 (陈苗)

埃默里大学全球健康副校长, 医学教授 (Jeffrey P. Koplan)

通讯地址:

Dr Jeffrey P Koplan,  
Emory Global Health  
Institute, Emory  
University, Atlanta, GA  
30322, USA  
jkoplan@emory.edu

| 部门                | 合作项目                                                                                                                                            | 领域        |
|-------------------|-------------------------------------------------------------------------------------------------------------------------------------------------|-----------|
| <b>政府</b>         |                                                                                                                                                 |           |
| 公共卫生体系            | 美国疾病预防控制中心与中国公共卫生的领导者们进行了超过三十五年的紧密合作，在中国加强高效和快速反应的公共卫生体系，改善国家与省市各级公共卫生机构。 <sup>2,5</sup>                                                        | 公共卫生      |
| 疾病暴发调查与报告         | 《中国疾病预防控制中心周报》以美国疾控中心的《发病率和死亡率周报》(MMWR)为参照，是中美疾控中心的合作成果。该期刊于2019年首次发行，用英语向世界报道中国的疫情。 <sup>6</sup>                                               | 公共卫生      |
| 中美全球疾病监测合作协议      | 2004年至2014年，中国国家流感中心(CNIC)与美国疾控中心达成有关建立中国流感监测项目的合作协议。 <sup>5</sup> 该协议建立了由411个实验室与556个定点医院(数据截至2009年)组成的网络和发布中英双语的每周流感报告，在CNIC网站上发布并与主要利益相关方共享。 | 公共卫生      |
| 非洲疾病预防控制中心        | 中美两国与非盟及其成员国合作成立了非洲疾控中心，为非洲疾控中心及其相关5个区域合作中心的基础设施和能力建设提供支持。                                                                                      | 全球卫生      |
| 援助西非抗击埃博拉病毒       | 中国与美国通力合作，在实验室能力建设、后勤与药物开发等方面共同抗击埃博拉疫情。 <sup>8</sup>                                                                                            | 全球卫生      |
| 中美新生儿神经管缺陷预防合作计划  | 美国疾控中心与中国机构建立伙伴关系，为叶酸强化政策的推出和实施提供了高质量科学证据。 <sup>9</sup>                                                                                         | 生物医学      |
| 人类基因组计划           | 中国、法国、德国、英国、日本和美国的20个科学中心合作，开展人类基因组测序工作。                                                                                                        | 生物医学      |
| <b>学术界</b>        |                                                                                                                                                 |           |
| 中国烟草控制合作          | 埃默里全球健康研究所、盖茨基金会与中国新探健康发展研究中心在中国22个城市开展了有效的烟草控制项目，公共场所吸烟现象显著减少。 <sup>11</sup>                                                                   | 公共卫生      |
| 耶鲁大学              | 耶鲁大学与中国机构的合作关系可以追溯到1835年，耶鲁大学毕业生彼德·帕克(又名伯驾)在中国开设了第一家美国式的医院。耶鲁大学一直与中国机构保持合作关系，与中国中南大学尤为密切，其医科毕业生可同时获得中国与康涅狄格州的执照。 <sup>12</sup>                  | 医学教育      |
| 哈佛中国卫生合作项目(HCHP)  | 该项目为哈佛大学教职工提供了一个中国研究的学术平台，尤其注重中国卫生体系方面。 <sup>13</sup>                                                                                           | 卫生体系      |
| <b>非营利性基金会与智库</b> |                                                                                                                                                 |           |
| 美国中华医学基金会(CMB)    | 美国中华医学基金会于1914年由洛克菲勒基金会捐赠成立，致力于在中国与东南亚提高卫生水平、公平与医疗质量。基金会的主要侧重点包括卫生政策、系统科学与卫生职业教育。 <sup>14</sup>                                                 | 医学教育；卫生体系 |
| 决心工程              | 是“卫健策略”旗下的一项全球非营利性项目，由美国疾控中心原主任费和平博士发起建立，与中国机构合作，通过控制高血压和减盐以预防心血管疾病死亡。 <sup>15</sup>                                                            | 慢性病预防     |
| 盖茨基金会             | 比尔及梅琳达·盖茨基金会在北京设有办事处，与中国合作伙伴共同为低收入地区开发创新的低成本疫苗和疫苗冷藏设备，以及用于非洲的降低艾滋病病毒感染风险的低成本干预措施。 <sup>16</sup>                                                 | 全球卫生      |

表 1: 中美医疗卫生合作部分成果

关系的情况亦有发生，<sup>21</sup>但与成千上万的受训人员、院系交流，以及成功的生物医药和公共卫生合作研究相比，这些情况少之又少。

耶鲁大学与哈佛大学是美国众多与中国同行在卫生和医学领域保持长期合作的教育机构中的两所大学。<sup>12, 13</sup>

非营利性基金会在中美卫生交流合作中也发挥了重要作用。美国中华医学基金会（CMB）与中国医学院校和公共卫生与护理学院的合作已有超过一百年的历史。双方合作培训医疗保健人员，激励医生留在有需要的地方，并发展中国在全球健康、卫生政策与系统科学方面的能力。<sup>14, 22</sup> 比尔和梅琳达·盖茨基金会直接或通过其他机构间接地在中国开展活动，如资助埃默里全球健康研究所和决心工程，促进中国的健康事业并利用中国的制造能力提供新的低成本手段，使有需要的群体受益。

为使两国人民的健康受益，我们需要维护和支持中美各个部门富有成效的、互利共赢的医学和科学交流合作。

### 中美卫生合作的挑战和机遇

中美卫生合作面临诸多挑战，包括根深蒂固的政治和经济差异、与新冠疫情相关的严重压力、也包括一些全球关注的问题：例如精神卫生问题、非传染性疾病、老龄化、城市化、气候变化等。必须承认两国政治和经济上的分歧，且可能需要包括持续对话的长期解决途径。

过去4年，甚至在新冠疫情之前，两个国家之间的一些分歧阻碍了两国间科学探索、友谊和工作的交流。<sup>2, 23</sup> 美国疾控中心中国办公室人员的大幅减少，影响了中美公共卫生的合作。<sup>2</sup> 过去4年，在美国的华人学者，尤其是那些与中国院校有密切合作的学者由于对此类合作的特别关注承受了巨大的压力。<sup>23</sup> 这些压力也因为新冠疫情而有所加剧。我们注意到两国间的紧张关系不是在科学或技术层面而是在较高的政治层面开始并趋于严重。

由于正在继续的新冠疫情打乱了人们的正常生活，国际旅行在一段时间内还会受到影响，面对面的互动将会减少。合作将继续通过网络手段进行，最终也将会回归到个人正常旅行和面对面的会议。我们对安全有效的疫苗有着期许，但仍不能绝对保证所有人都会接种。中美如在疫苗研发和分配方面

强强合作，将使两国乃至全世界受益。

两国还面临着许多固有的、长期的社会和卫生方面的挑战，这些挑战在未来会越来越突出，预示着在卫生和医学方面中美合作的机会。这包括：由于中国城市的急剧膨胀和特大城市的发展所带来的城市的卫生和健康问题；两国人口老龄化而导致的老年人对医疗和社会服务需求急剧增长的挑战；环境恶化、气候变化、能源的需求和解决方法、与健康相关的政策和经济问题，以及非传染性疾病及其危险因素（例如烟草使用、吸烟、饮食或营养过剩、盐摄入、脂肪摄入、身体运动不足、糖尿病、心脏病和中风、精神卫生和药物滥用、关节炎和行动能力受限以及伤害等）。

除新冠疫情外，全球健康方面的长期挑战包括中低收入国家脆弱的卫生系统。它们很可能被新发传染病或慢性病击垮。尽管美国和中国在全球健康援助和参与的目标、方法以及成功和失败的方面存在差异，但两国仍可以找到互补的领域。美国在评估健康援助项目方面有丰富的经验，可以提供经验和教训。在美国难以触及的某些地缘政治环境中，中国可以以更安全有效的方式运作。正如中美在抗击埃博拉方面的合作所证明的那样，中国在人力和物流方面的优势可以和美国在技术和管理方面的能力相得益彰。美国有更多的全球健康人力资源和更多的全球健康课程项目，可支持美国全球健康的运作规模。中国的全球健康项目在数量和规模上相对有限。中美两国间的双向交流可以丰富全球健康的科学、知识和信息。<sup>24</sup>

疫情之后不久的将来会充满挑战。然而，正因为我们可以相互学习和借鉴的地方是如此之多，我们在生物医学和公共卫生方面的联系必须保持和加强。中美科学家在如何应对新冠疫情流行因素和如何最佳处理未来新的疫情方面进行合作是很有意义的。

### 对新冠疫情后中美卫生合作的建议

中美卫生和医学合作成果颇丰。我们分析的是中国和美国，但实际上，这是全球性



的问题。因为只要新冠病毒还在传播，每个国家都会受到影响。就一国而言，控制住病毒传播值得赞赏，但它必须为病毒的再输入和传播做好准备。伙伴关系、共同协作、信息共享、保持透明、提高沟通的准确性和及时性等方式和措施应对疫情十分重要。我们必须保持和呵护这种合作，以保证我们的共同利益并应对新的健康挑战和威胁。

在新冠疫情流行时期，政治紧张局势加剧。我们希望美国新的领导层能帮助解决中美政治和经济的分歧。在许多领域，中美的确有着实际的或潜在的竞争。然而，我们已经证明在卫生和医学领域，我们可以开展卓有成效的合作，实现互利共赢，因为我们生活在一个相互紧密联系的世界里。<sup>25</sup> 新冠疫情发生后，合作与交流将比以往任何时候都更加重要。我们需要学习和欣赏彼此的异同。异和同让我们在科学知识方面受益，也使得我们的交往更有挑战性。在此我们提出三项建议：

首先，为了控制当前的疫情、恢复正常，并为未来的传染病暴发和疫情做准备，我们需要恢复目前受到政治层面阻力的中美两国政府机构间医疗卫生合作和伙伴关系。<sup>26-</sup>  
<sup>28</sup> 合作可以包括两国疾病预防控制中心（CDC）之间的合作、<sup>29</sup> 美国食品药品监督管理局（FDA）与中国国家药品监督管理局之间的合作、美国国际开发署（USAID）与中国国家国际发展合作署（CIDCA）之间的合作、<sup>30</sup> 中国医学科学院与美国国立卫生研究院（NIH）之间的合作。我们对拜登政府宣布美国不会退出世界卫生组织，并将参加 COVID-19 全球疫苗获取计划（COVAX）的声明表示欢迎。这为美国与世卫组织、中国合作来帮助缺乏财政资源的国家提供了机会<sup>31</sup>。甚至，如《柳叶刀》最近一篇社论所呼吁的，两国可以有比 COVAX 更高的目标，来增加中低收入国家实际获得 COVID-19 疫苗的机会<sup>32</sup>。中国有大规模检测的经验和优势，亦可以与美国合作，协助非洲国家开展新冠病例检测和筛查。中美两国应与世卫组织和其他国家合作，扩大“疫苗接种记录黄

卡（疫苗护照）”的应用，以应对新冠大流行带来的需求。

其次，促进学术界和科学界之间因政治考虑和疫情而受阻的合作和交流。即便是在双边关系较为紧张的局面下和疫情期间，学术交流仍在进行。但如继续按目前的做法，学术交流将举步维艰<sup>33,34</sup>。我们应该鼓励而不是阻碍学术机构之间在卫生和医学方面的合作和交流。应纠正之前的一些错误举措，例如停止在中国富布赖特项目的决定。双方应该真诚投入并努力改善在科学和文化方面的双边交流。

最后，中美在卫生和医学领域合作的商业价值是不言而喻的。中美可以合作为卫生创新投资、扩大药品市场准入、加强监管和控制合成阿片类药物，这些对中美双方都有好处<sup>27</sup>。包括企业和非营利组织在内的私营机构和民间组织亦有充足的机会与两国政府一起改善中美在卫生和医学方面的合作。

#### 作者贡献

本文全体作者同等贡献于文章构思和写作。本文全体作者认可最终版本。

#### 利益声明

李立明教授曾担任中国疾病预防控制中心首任主任与中国医学科学院、北京协和医学院常务副院校长。王克安教授曾担任中国预防医学科学院第三任院长。卡普兰教授于 1998 至 2002 年担任美国疾病预防控制中心（CDC）主任，2006 年至 2013 年担任埃默里全球健康研究所创始所长，为国际国家公共卫生联盟（IANPHI）共同创始人（自 2006 年始）。陈茁无利益冲突声明。

#### 致谢

本文部分基于 2020 年 11 月 12 日卡普兰博士在“中国和世界后疫情时代研讨会”上的主题演讲，该讨论会由哈佛大学费正清中国研究中心和武汉大学医学院合作举办。邓烨然和席远航对本文中文翻译亦有贡献。

#### 参考文献：

- 1 Yang MD, Bryant JH, Henry P. Background of US-PRC government cooperation in health: descriptive study and workshop on health services research in Shanghai County. *Am J Public Health* 1982; 72(9 Suppl): 9-11.
- 2 Seligsohn D. The Rise and fall of the US-China health relationship. *Asian Perspect* 2020, 45(1): doi:10.1353/apr.0.0013.
- 3 Yang MD, Koplan JP, Bryant JH. Health services in Shanghai County: the future of US-PRC governmental collaboration in health services research. *Am J Public Health* 1982; 72(9 Suppl): 92-3.
- 4 Potter W, Ko G, Zhang L, Yan W. Clozapine in China: a review and preview of US/PRC collaboration. *Psychopharmacology* 1989; 99 Suppl: S87-91.

- 5 Shu Y, Song Y, Wang D, Greene CM, Moen A, Lee CK, Chen Y, Xu X, McFarland J, Xin L, Bresee J, Zhou S, Chen T, Zhang R, Cox N. A ten-year China-US laboratory collaboration: improving response to influenza threats in China and the world, 2004–2014. *BMC Public Health* 2019; 19(3): 520.
- 6 Gao GF. Foreword from Editor-in-Chief George F. Gao - China's Outreach to the World: Public Health Goes Global. *China CDC Weekly* 2019; 1(1): 1–2.
- 7 U.S.-China Strategic and Economic Dialogue VIII Strategic Track Select Outcomes. June 7, 2016 2016. //2009-2017.state.gov/r/pa/prs/ps/2016/06/258157.htm (accessed November 14, 2020).
- 8 Aboaf C. U.S.-China collaboration in combating the 2014 Ebola outbreak in West Africa. <https://www.cartercenter.org/resources/pdfs/peace/china/trs-03-combating-ebola-breakout.pdf> (accessed November 14, 2020).
- 9 Berry RJ, Li Z, Erickson JD, Li S, Moore CA, Wang H, Mulinare J, Zhao P, Wong LY, Gindler J, Hong SX, Correa A. Prevention of neural-tube defects with folic acid in China. *N Engl J Med* 1999; 341(20): 1485–90.
- 10 Collins FS. The Human Genome Project: Lessons from large-scale biology. *Science* 2003; 300(5617): 286–90.
- 11 Redmon P, Koplan J, Eriksen M, Li S, Wang K. The role of cities in reducing smoking in China. *Int J Environ Res Public Health* 2014; 11(10): 10062–75.
- 12 Salovey P. Summary of Yale University's Collaborations and History with China. 2014. [https://world.yale.edu/sites/default/files/files/ChinaBlueBook\\_eng\\_2014.pdf](https://world.yale.edu/sites/default/files/files/ChinaBlueBook_eng_2014.pdf) (accessed January 19, 2021).
- 13 HSPH. About Us: History of Harvard and Health in China. 2012-09-20. <https://sites.sph.harvard.edu/china-health-partnership/about-us-and-contact/> (accessed January 19, 2021).
- 14 CMB. What We Do | China Medical Board. 2021. [https://chinamedicalboard.org/what\\_we\\_do](https://chinamedicalboard.org/what_we_do) (accessed January 19, 2021).
- 15 Resolve. Resolve to Save Lives: Where we work: China. <https://resolvetosavelives.org/where-we-work> (accessed January 19, 2021).
- 16 Bill and Melinda Gates Foundation: Case Highlights. 1/1/0001. <https://www.gatesfoundation.org/Where-We-Work/China-Office/Case-Highlights> (accessed January 19, 2021).
- 17 Wald NJ. Commentary: A brief history of folic acid in the prevention of neural tube defects. *Int J Epidemiol* 2011; 40(5): 1154–6.
- 18 NSF. Dear Colleague Letter: NSF/NSFC Joint Research on Environmental Sustainability Challenges (nsf18096) | NSF - National Science Foundation. 2018. <https://www.nsf.gov/pubs/2018/nsf18096/nsf18096.jsp> (accessed January 19, 2021).
- 19 Press F, Smith PM. Science and technology in the Carter Presidency. *Presidential Science Advisors*: Springer Netherlands; 2010: 37–56.
- 20 National Center for Education Statistics. Digest of Education Statistics, 2018. In: National Center for Education Statistics, US Department of Education, Editor; 2018.
- 21 Siu L, Chun C. Yellow peril and techno-orientalism in the time of Covid-19: Racialized contagion, scientific espionage, and techno-economic warfare. *J Asian Am Stud* 2020; 23(3): 421–40.
- 22 Palmer J. Lincoln Chen: fostering health collaboration with Asia. *Lancet* 2010; 375(9720): 1073.
- 23 Lewis MK. Criminalizing China. *J Crim Law Criminol* 2021; 111(1): 145–225.
- 24 Crisp LN. Global health capacity and workforce development: Turning the world upside down. *Infect Dis Clin North Am* 2011; 25(2): 359–67.
- 25 Li Z, Gao GF. Strengthening public health at the community-level in China. *Lancet Public Health* 2020; 5(12): e629–e30.
- 26 Koplan JP, Butler-Jones D, Tsang T, Wang Y. Public health lessons from Severe Acute Respiratory Syndrome a decade later. *Emerg Infect Dis* 2013; 19(6): 861–3.
- 27 Bouey J. China's health system reform and global health strategy in the context of COVID-19. Santa Monica, CA: RAND Corporation, 2020. <https://www.rand.org/pubs/testimonies/CTA321-1.html> (accessed March 18, 2021).
- 28 Anderson BD, Ma M-J, Wang G-L, Bi Z-Q, Lu B, Wang X-J, Wang C-X, Chen S-H, Qian Y-H, Song S-X, Li M, Zhao T, Wu M-N, Borkenhagen L, Cao W-C, Gray GC. Prospective surveillance for influenza A virus in Chinese swine farms. *Emerg Microbes & Infect* 2018; 7(1): 1–10.
- 29 Gao G, Nkengasong J. Public health priorities for China-Africa cooperation. *Lancet Public Health* 2019; 4(4): e177–e8.
- 30 China International Development Cooperation Agency. <http://en.cidca.gov.cn/> (accessed November 14, 2020).
- 31 Gostin LO, Shalala DE, Hamburg MA, Bloom BR, Koplan JP, Rimer BK, Williams MA. A global health action agenda for the Biden administration. *Lancet* 2021; 397(10268): 5–8.
- 32 Lancet. Editorial: Access to COVID-19 vaccines: looking beyond COVAX. *Lancet* 2021; 397(10278): 941.
- 33 Lee JJ, Haupt JP. Scientific collaboration on COVID-19 amidst geopolitical tensions between the US and China. *J Higher Educ* 2020; 92(2): 303–329.
- 34 Yuan Y. Unique Role of Think Tank Exchange in Promoting the China-U.S. Relationship. *China Q Int Strateg Stud* 2019; 5(2): 143–59.
